# Supplementary material for: The Census of Exoplanets in Visual Binaries: Population Trends from a Volume-Limited Gaia DR2 and Literature Search
Source: Frontiers journal article supplement (doi:10.3389/fspas.2021.625250), 2021-03-19
Supplement: downloadfile [file 625250]

| HOST_STARS_200pc  |             |                                                                                                                                                                                                                                                                                                                                                                                                                                                                                                                                                                                                                                                                                                                                                                                                                                                                                                                                                                                                                                                                                                                                                    |
|-------------------|-------------|----------------------------------------------------------------------------------------------------------------------------------------------------------------------------------------------------------------------------------------------------------------------------------------------------------------------------------------------------------------------------------------------------------------------------------------------------------------------------------------------------------------------------------------------------------------------------------------------------------------------------------------------------------------------------------------------------------------------------------------------------------------------------------------------------------------------------------------------------------------------------------------------------------------------------------------------------------------------------------------------------------------------------------------------------------------------------------------------------------------------------------------------------|
| 1                 | Name        | host star name, common string in all tables                                                                                                                                                                                                                                                                                                                                                                                                                                                                                                                                                                                                                                                                                                                                                                                                                                                                                                                                                                                                                                                                                                        |
| 2                 | Simbad      | host star name, recognised in Simbad                                                                                                                                                                                                                                                                                                                                                                                                                                                                                                                                                                                                                                                                                                                                                                                                                                                                                                                                                                                                                                                                                                               |
| 3                 | GDR2_ID     | host star Gaia DR2 ID                                                                                                                                                                                                                                                                                                                                                                                                                                                                                                                                                                                                                                                                                                                                                                                                                                                                                                                                                                                                                                                                                                                              |
| 4                 | BIN         | binary flag:<br>0 = single star<br>1 = visual binary (system in Binary_properties table)<br>2 = other method binary (never resolved and considered as single here)<br>3 = optical candidate companion (yet to be astrometrically confirmed and considered as single here)                                                                                                                                                                                                                                                                                                                                                                                                                                                                                                                                                                                                                                                                                                                                                                                                                                                                          |
| 5                 | SpT         | host star spectral type                                                                                                                                                                                                                                                                                                                                                                                                                                                                                                                                                                                                                                                                                                                                                                                                                                                                                                                                                                                                                                                                                                                            |
| 6                 | Teff        | host star effective temperature (K)                                                                                                                                                                                                                                                                                                                                                                                                                                                                                                                                                                                                                                                                                                                                                                                                                                                                                                                                                                                                                                                                                                                |
| 7                 | M_star      | host star mass (Msun)                                                                                                                                                                                                                                                                                                                                                                                                                                                                                                                                                                                                                                                                                                                                                                                                                                                                                                                                                                                                                                                                                                                              |
| 8                 | RA          | host star RA coordinate (deg). If GDR2_ID: from Gaia DR2, else: from SIMBAD                                                                                                                                                                                                                                                                                                                                                                                                                                                                                                                                                                                                                                                                                                                                                                                                                                                                                                                                                                                                                                                                        |
| 9                 | DEC         | host star DE coordinate (deg). If GDR2_ID: from Gaia DR2, else: from SIMBAD                                                                                                                                                                                                                                                                                                                                                                                                                                                                                                                                                                                                                                                                                                                                                                                                                                                                                                                                                                                                                                                                        |
| 10                | Plx         | host star parallax (mas). If GDR2_ID, from Gaia DR2, else: from SIMBAD                                                                                                                                                                                                                                                                                                                                                                                                                                                                                                                                                                                                                                                                                                                                                                                                                                                                                                                                                                                                                                                                             |
| 11                | pmRA        | host star RA proper motion (mas). If GDR2_ID, from Gaia DR2, else: from SIMBAD                                                                                                                                                                                                                                                                                                                                                                                                                                                                                                                                                                                                                                                                                                                                                                                                                                                                                                                                                                                                                                                                     |
| 12                | pmDEC       | host star DE proper motion (mas). If GDR2_ID, from Gaia DR2, else: from SIMBAD                                                                                                                                                                                                                                                                                                                                                                                                                                                                                                                                                                                                                                                                                                                                                                                                                                                                                                                                                                                                                                                                     |
| 13                | Gmag        | host star Gaia DR2 G-band magnitude (mag)                                                                                                                                                                                                                                                                                                                                                                                                                                                                                                                                                                                                                                                                                                                                                                                                                                                                                                                                                                                                                                                                                                          |
| 14                | BPmag       | host star Gaia DR2 BP-band magnitude (mag)                                                                                                                                                                                                                                                                                                                                                                                                                                                                                                                                                                                                                                                                                                                                                                                                                                                                                                                                                                                                                                                                                                         |
| 15                | RPmag       | host star Gaia DR2 RP-band magnitude (mag)                                                                                                                                                                                                                                                                                                                                                                                                                                                                                                                                                                                                                                                                                                                                                                                                                                                                                                                                                                                                                                                                                                         |
| 16                | Other_names | other names of the host star in the various exoplanets catalogues                                                                                                                                                                                                                                                                                                                                                                                                                                                                                                                                                                                                                                                                                                                                                                                                                                                                                                                                                                                                                                                                                  |
|                   |             |                                                                                                                                                                                                                                                                                                                                                                                                                                                                                                                                                                                                                                                                                                                                                                                                                                                                                                                                                                                                                                                                                                                                                    |
| ALL_PLANETS_200pc |             |                                                                                                                                                                                                                                                                                                                                                                                                                                                                                                                                                                                                                                                                                                                                                                                                                                                                                                                                                                                                                                                                                                                                                    |
| 1                 | Name        | host star name, common string in all tables                                                                                                                                                                                                                                                                                                                                                                                                                                                                                                                                                                                                                                                                                                                                                                                                                                                                                                                                                                                                                                                                                                        |
| 2                 | Planet      | planet identification                                                                                                                                                                                                                                                                                                                                                                                                                                                                                                                                                                                                                                                                                                                                                                                                                                                                                                                                                                                                                                                                                                                              |
| 3                 | BIN         | binary flag:<br>0 = single star<br>1 = visual binary (system in Binary_properties table)<br>2 = other method binary (never resolved and considered as single here)<br>3 = optical candidate companion (yet to be astrometrically confirmed and considered as single here)                                                                                                                                                                                                                                                                                                                                                                                                                                                                                                                                                                                                                                                                                                                                                                                                                                                                          |
| 4                 | Mass        | planet mass or minimum mass (Mjup)                                                                                                                                                                                                                                                                                                                                                                                                                                                                                                                                                                                                                                                                                                                                                                                                                                                                                                                                                                                                                                                                                                                 |
| 5                 | Radius      | planet radius (Rjup)                                                                                                                                                                                                                                                                                                                                                                                                                                                                                                                                                                                                                                                                                                                                                                                                                                                                                                                                                                                                                                                                                                                               |
| 6                 | Period      | planet orbital period (days)                                                                                                                                                                                                                                                                                                                                                                                                                                                                                                                                                                                                                                                                                                                                                                                                                                                                                                                                                                                                                                                                                                                       |
| 7                 | SMA         | planet semi-major axis (AU)                                                                                                                                                                                                                                                                                                                                                                                                                                                                                                                                                                                                                                                                                                                                                                                                                                                                                                                                                                                                                                                                                                                        |
| 8                 | Ecc         | planet eccentricity                                                                                                                                                                                                                                                                                                                                                                                                                                                                                                                                                                                                                                                                                                                                                                                                                                                                                                                                                                                                                                                                                                                                |
| 9                 | Incl        | planet inclination (deg)                                                                                                                                                                                                                                                                                                                                                                                                                                                                                                                                                                                                                                                                                                                                                                                                                                                                                                                                                                                                                                                                                                                           |
| 10                | Method      | planet detection method                                                                                                                                                                                                                                                                                                                                                                                                                                                                                                                                                                                                                                                                                                                                                                                                                                                                                                                                                                                                                                                                                                                            |
| 11                | M_star      | host star mass (Msun) – same as in HOST_STARS_200pc table                                                                                                                                                                                                                                                                                                                                                                                                                                                                                                                                                                                                                                                                                                                                                                                                                                                                                                                                                                                                                                                                                          |
| 12                | Metallicity | host star metallicity (dex)                                                                                                                                                                                                                                                                                                                                                                                                                                                                                                                                                                                                                                                                                                                                                                                                                                                                                                                                                                                                                                                                                                                        |
|                   |             |                                                                                                                                                                                                                                                                                                                                                                                                                                                                                                                                                                                                                                                                                                                                                                                                                                                                                                                                                                                                                                                                                                                                                    |
| Binary_properties |             |                                                                                                                                                                                                                                                                                                                                                                                                                                                                                                                                                                                                                                                                                                                                                                                                                                                                                                                                                                                                                                                                                                                                                    |
| 1                 | Name        | host star name, common string in all tables                                                                                                                                                                                                                                                                                                                                                                                                                                                                                                                                                                                                                                                                                                                                                                                                                                                                                                                                                                                                                                                                                                        |
| 2                 | System      | full structure of the planetary-stellar system – <i>only indicative of the overall system architecture, and not a proposed naming convention</i> . Component A systematically denotes the planet host irrespectively of the relative component masses, unless already named differently in the literature. See column 'Comments' for additional information about stellar companion identifications.                                                                                                                                                                                                                                                                                                                                                                                                                                                                                                                                                                                                                                                                                                                                               |
| 3                 | N_star      | number of resolved stellar components in the system                                                                                                                                                                                                                                                                                                                                                                                                                                                                                                                                                                                                                                                                                                                                                                                                                                                                                                                                                                                                                                                                                                |
| 4                 | Plx         | host star parallax (mas)                                                                                                                                                                                                                                                                                                                                                                                                                                                                                                                                                                                                                                                                                                                                                                                                                                                                                                                                                                                                                                                                                                                           |
| 5                 | ang_sep     | angular projected separation (arcsec)                                                                                                                                                                                                                                                                                                                                                                                                                                                                                                                                                                                                                                                                                                                                                                                                                                                                                                                                                                                                                                                                                                              |
| 6                 | phys_sep    | physical projected separation (AU)                                                                                                                                                                                                                                                                                                                                                                                                                                                                                                                                                                                                                                                                                                                                                                                                                                                                                                                                                                                                                                                                                                                 |
| 7                 | SpT1        | host star spectral type                                                                                                                                                                                                                                                                                                                                                                                                                                                                                                                                                                                                                                                                                                                                                                                                                                                                                                                                                                                                                                                                                                                            |
| 8                 | Mass1       | host star mass (Msun)                                                                                                                                                                                                                                                                                                                                                                                                                                                                                                                                                                                                                                                                                                                                                                                                                                                                                                                                                                                                                                                                                                                              |
| 9                 | SpT2        | adopted companion spectral type<br>with a + when the companion is itself a tight binary (see also column#23, and Triple_systems table)                                                                                                                                                                                                                                                                                                                                                                                                                                                                                                                                                                                                                                                                                                                                                                                                                                                                                                                                                                                                             |
| 10                | Mass2       | adopted companion mass (Msun)<br>sum of components when the companion is itself a tight binary (see also column#23, and Triple_systems table)                                                                                                                                                                                                                                                                                                                                                                                                                                                                                                                                                                                                                                                                                                                                                                                                                                                                                                                                                                                                      |
| 11                | Delta_G     | G-band magnitude difference if both components in Gaia DR2 (mag)                                                                                                                                                                                                                                                                                                                                                                                                                                                                                                                                                                                                                                                                                                                                                                                                                                                                                                                                                                                                                                                                                   |
| 12                | SpT2_Gaia   | companion spectral type from Gaia DR2 TIC analysis (same format as column#7 if companion is itself a binary)                                                                                                                                                                                                                                                                                                                                                                                                                                                                                                                                                                                                                                                                                                                                                                                                                                                                                                                                                                                                                                       |
| 13                | Mass2_Gaia  | companion mass from Gaia DR2 TIC analysis (Msun) (same format as colum#8 if companion is itself a binary)                                                                                                                                                                                                                                                                                                                                                                                                                                                                                                                                                                                                                                                                                                                                                                                                                                                                                                                                                                                                                                          |
| 14                | Notes       | Gaia DR2 flags:<br>– 1 = binary in Gaia DR2 with no flag to report<br>– prim_unres = primary is an unresolved binary in Gaia DR2<br>– sec_unres = companion is itself a tight binary, unresolved in Gaia DR2 (1 entry in GaiaDR2_companions, see also Triple_systems)<br>– sec_resBin = companion is itself a tight binary, resolved in Gaia DR2 (2 entries in GaiaDR2_companions, see also Triple_systems)<br>– prim_noGDR2 = primary without Gaia DR2 ID in HOST_STARS_200pc (section 2 in GaiaDR2_companions)<br>– sec_noAstr = known companion is in Gaia DR2 but without astrometric solution (section 3 in GaiaDR2_companions)<br>– sec_badAstr = known companion is in Gaia DR2 but with bad astrometry (section 3 in GaiaDR2_companions)<br>– sec_noColors = companion is in Gaia DR2 but without BP/RP magnitudes (mass and spectral type estimated from absolute G-band)<br>– sec_offMS = companion falling outside of TIC Gaia DR2 main sequence (mass and spectral type estimated from absolute G-band)<br>– WD = companion is white dwarf in Gentile Fusillo et al. (2019) sample<br>– else (-) = binary companion is not in Gaia DR2 |
| 15                | Dmag        | magnitude difference if not Delta_G (mag)                                                                                                                                                                                                                                                                                                                                                                                                                                                                                                                                                                                                                                                                                                                                                                                                                                                                                                                                                                                                                                                                                                          |
| 16                | Dmag_band   | photometric band of Dmag                                                                                                                                                                                                                                                                                                                                                                                                                                                                                                                                                                                                                                                                                                                                                                                                                                                                                                                                                                                                                                                                                                                           |
| 17                | SpT2_lit    | companion spectral type from the literature (same format as column#7 if companion is itself a binary)                                                                                                                                                                                                                                                                                                                                                                                                                                                                                                                                                                                                                                                                                                                                                                                                                                                                                                                                                                                                                                              |
| 18                | Mass2_lit   | companion mass from the literature (Msun) (same format as colum#8 if companion is itself a binary)                                                                                                                                                                                                                                                                                                                                                                                                                                                                                                                                                                                                                                                                                                                                                                                                                                                                                                                                                                                                                                                 |
| 19                | LitRef      | references for literature properties                                                                                                                                                                                                                                                                                                                                                                                                                                                                                                                                                                                                                                                                                                                                                                                                                                                                                                                                                                                                                                                                                                               |
| 20                | Link        | links to literature references                                                                                                                                                                                                                                                                                                                                                                                                                                                                                                                                                                                                                                                                                                                                                                                                                                                                                                                                                                                                                                                                                                                     |
| 21                | BinRef      | references for binary nature of systems                                                                                                                                                                                                                                                                                                                                                                                                                                                                                                                                                                                                                                                                                                                                                                                                                                                                                                                                                                                                                                                                                                            |
| 22                | Surveys     | list (no exhaustive) of surveys mentioning the binary nature of systems                                                                                                                                                                                                                                                                                                                                                                                                                                                                                                                                                                                                                                                                                                                                                                                                                                                                                                                                                                                                                                                                            |
| 23                | Comments    | additional comments about the systems or companions                                                                                                                                                                                                                                                                                                                                                                                                                                                                                                                                                                                                                                                                                                                                                                                                                                                                                                                                                                                                                                                                                                |
|                   |             |                                                                                                                                                                                                                                                                                                                                                                                                                                                                                                                                                                                                                                                                                                                                                                                                                                                                                                                                                                                                                                                                                                                                                    |

| Triple_systems     |                      |                                                                                                                                            |
|--------------------|----------------------|--------------------------------------------------------------------------------------------------------------------------------------------|
| 1                  | <b>Name</b>          | host star name, common string in all tables                                                                                                |
| 2                  | <b>Configuration</b> | triple system architecture – <i>indicative only, not naming convention. A always refers to the host, B and C to the stellar companions</i> |
| 3                  | <b>Mass1</b>         | host star mass (Msun), component A in column#2                                                                                             |
| 4                  | <b>Mass2</b>         | companion mass (Msun), component B in column#2                                                                                             |
| 5                  | <b>Mass3</b>         | companion mass (Msun), component C in column#2                                                                                             |
| 6                  | <b>s12</b>           | separations (AU) between components A (of mass M1) and B (of mass M2)                                                                      |
| 7                  | <b>s13</b>           | separations (AU) between components A (of mass M1) and C (of mass M3)                                                                      |
| 8                  | <b>s23</b>           | separations (AU) between components B (of mass M2) and C (of mass M3)                                                                      |
|                    |                      |                                                                                                                                            |
| GaiaDR2_companions |                      |                                                                                                                                            |
| 1                  | <b>Name</b>          | host star name, common string in all tables                                                                                                |
| 2                  | <b>GDR2_ID1</b>      | host star Gaia DR2 ID                                                                                                                      |
| 3                  | <b>RA1</b>           | host star RA coordinate (deg). If GDR2_ID: from Gaia DR2, else: from SIMBAD                                                                |
| 4                  | <b>DE1</b>           | host star DE coordinate (deg). If GDR2_ID: from Gaia DR2, else: from SIMBAD                                                                |
| 5                  | <b>Plx1</b>          | host star parallax (mas). If GDR2_ID, from Gaia DR2, else: from SIMBAD                                                                     |
| 6                  | <b>pmRA1</b>         | host star RA proper motion (mas). If GDR2_ID, from Gaia DR2, else: from SIMBAD                                                             |
| 7                  | <b>pmDE1</b>         | host star DE proper motion (mas). If GDR2_ID, from Gaia DR2, else: from SIMBAD                                                             |
| 8                  | <b>Gmag1</b>         | host star Gaia DR2 G-band magnitude (mag)                                                                                                  |
| 9                  | <b>BPmag1</b>        | host star Gaia DR2 BP-band magnitude (mag)                                                                                                 |
| 10                 | <b>RPmag1</b>        | host star Gaia DR2 RP-band magnitude (mag)                                                                                                 |
| 11                 | <b>Teff1</b>         | host star effective temperature (K)                                                                                                        |
| 12                 | <b>GDR2_ID2</b>      | companion Gaia DR2 ID                                                                                                                      |
| 13                 | <b>RA2</b>           | companion RA coordinate (deg). If GDR2_ID: from Gaia DR2, else: from SIMBAD                                                                |
| 14                 | <b>DE2</b>           | companion DE coordinate (deg). If GDR2_ID: from Gaia DR2, else: from SIMBAD                                                                |
| 15                 | <b>Plx2</b>          | companion parallax (mas). If GDR2_ID, from Gaia DR2, else: from SIMBAD                                                                     |
| 16                 | <b>pmRA2</b>         | companion RA proper motion (mas). If GDR2_ID, from Gaia DR2, else: from SIMBAD                                                             |
| 17                 | <b>pmDE2</b>         | companion DE proper motion (mas). If GDR2_ID, from Gaia DR2, else: from SIMBAD                                                             |
| 18                 | <b>Gmag2</b>         | companion Gaia DR2 G-band magnitude (mag)                                                                                                  |
| 19                 | <b>BPmag2</b>        | companion Gaia DR2 BP-band magnitude (mag)                                                                                                 |
| 20                 | <b>RPmag2</b>        | companion Gaia DR2 RP-band magnitude (mag)                                                                                                 |
| 21                 | <b>Teff2</b>         | companion effective temperature (K)                                                                                                        |
